# New formula and conversion factor to compute tree species basic wood density from a global wood technology database

Ghislain Vieilledent<sup>\*,1,2,3</sup>      Fabian Jörg Fischer<sup>4</sup>  
Jérôme Chave<sup>4</sup>      Daniel Guibal<sup>5,6</sup>  
Patrick Langbour<sup>5,6</sup>      and      Jean Gérard<sup>5,6</sup>

[\*] Corresponding author: [ghislain.vieilledent@Cirad.fr](mailto:ghislain.vieilledent@Cirad.fr)

[1] Cirad, UPR Forêt et Sociétés, F-34398 Montpellier, France

[2] Forêt et Sociétés, Univ Montpellier, Cirad, Montpellier, France

[3] Joint Research Centre of the European Commission, Bio-economy unit, I-21027 Ispra, Italy

[4] UMR 5174 Laboratoire Evolution et Diversité Biologique, Université Paul Sabatier, CNRS, IRD, Toulouse, France

[5] Cirad, UPR BioWooEB, F-34398 Montpellier, France

[6] BioWooEB, Univ Montpellier, Cirad, Montpellier, France

*Short title:* New conversion factor to compute basic wood density.

## Abstract

**Premise of the study:** Basic wood density is an important ecological trait for woody plants. It is used to characterize species performance and fitness in community ecology, and to compute tree and forest biomass in carbon cycle studies. While wood density has been historically measured at 12% moisture, it is convenient for ecological purposes to convert this measure to basic wood density, i.e. the ratio of dry mass over green volume. Basic wood density can then be used to compute tree dry biomass from living tree volume.

**Methods:** Here, we derive a new, exact formula to compute the basic wood density  $D_b$  from the density at moisture content  $w$  denoted  $D_w$ , the fibre saturation point  $S$ , and the volumetric shrinkage coefficient  $R$ . We estimated a new conversion factor using a global wood technology database where values to use this formula are available for 4022 trees collected in 64 countries (mostly tropical) and representing 872 species.

**Key results:** We show that previous conversion factors used to convert densities at 12% moisture into basic wood densities are inconsistent. Based on theory and data, we found that basic wood density could be inferred from the density at 12% moisture using the following formula:  $D_b = 0.828D_{12}$ . This value of 0.828 provides basic wood density estimates 4-5% smaller than values inferred from previous conversion factors.

**Conclusions:** This new conversion factor should be used to derive basic wood densities in global wood density databases. This would prevent overestimating global forest carbon stocks and allow predicting better tree species community dynamics from wood density.

*Keywords:* basic wood density, biomass, carbon stock, fibre saturation point, forest dynamics, functional trait, tree species, tropical forest, wood specific gravity

## 28 INTRODUCTION

29 Wood density of woody plants is a key functional trait (Chave *et al.*, 2009; Violle *et al.*,  
30 2007). It helps understand the functioning of forest ecosystems both in terms of carbon  
31 sequestration (Chave *et al.*, 2005; Vieilledent *et al.*, 2012) and community dynamics (Díaz  
32 *et al.*, 2016; Kunstler *et al.*, 2016; Westoby & Wright, 2006). In carbon cycle research,  
33 tree wood density is used to compute forest carbon stock and assess the role of forests in  
34 mitigating climate change (Pan *et al.*, 2011; Vieilledent *et al.*, 2016) or evaluate the impact  
35 of deforestation on climate (Achard *et al.*, 2014). In community ecology, wood density is  
36 a proxy for species performance (Lachenbruch & McCulloh, 2014), reflecting a trade-off  
37 between growth potential and mortality risk from biomechanical or hydraulic failure (Díaz  
38 *et al.*, 2016). Fast-growing, short-lived species tend to have a lower wood density while  
39 slow-growing, long-lived species tend to have a higher wood density (Chave *et al.*, 2009;  
40 Greenwood *et al.*, 2017). In wood technology, most physical and mechanical properties of  
41 wood (strength, stiffness, porosity, heat transmission, yield of pulp per unit volume, etc.)  
42 are closely related to wood density (Sallenave, 1955; Shmulsky & Jones, 2011; Thibaut  
43 *et al.*, 2001). This explains why wood density has been commonly measured in forestry  
44 institutes, where wood was principally studied for construction or paper making.

45 Wood density has been originally measured at ambient air moisture after air drying  
46 (Glass & Zelinka, 2010). Thereafter, wood density has been measured at fixed moisture  
47 content, such as 15% or 12%, this last value now being an international standard (Sallenave,  
48 1955). In temperate countries, construction wood is at equilibrium with ambient air at an  
49 average moisture close to 12%. Wood density at 12% moisture is the ratio between the mass  
50 and volume of a wood sample at 12% moisture, and is expressed in  $\text{g}/\text{cm}^3$ . In the past, this  
51 measure was also commonly reported in the British literature in pounds per cubic foot ( $1$   
52  $\text{g}/\text{cm}^3 = 62.427 \text{ lb}/\text{ft}^3$ ) (Reyes *et al.*, 1992; Sallenave, 1971). In carbon cycle research and

53 ecology, the most useful metric is the basic wood density, the ratio between oven-dry mass  
54 (at 0% moisture) and green volume (water-saturated wood volume) in  $\text{g}/\text{cm}^3$ . This trait  
55 is sometimes referred to as wood specific gravity (abbreviated WSG). Both terms describe  
56 the same quantity but wood specific gravity is usually the ratio between the mass of a  
57 given volume of wood and the mass of the same volume of water, and is therefore unitless  
58 (Williamson & Wiemann, 2010). Here we use the term “basic wood density”. Basic wood  
59 density can be directly used to compute tree dry biomass and carbon stock from a standing  
60 tree volume estimated using an allometric equation (Brown, 1997; Chave *et al.*, 2005, 2014;  
61 Vieilledent *et al.*, 2012). For example, Chave *et al.* (2014) have estimated the following  
62 pantropical tree biomass allometric equation:  $AGB = 0.0673 \times (\rho D^2 H)^{0.976}$  with  $AGB$  the  
63 tree dry aboveground biomass in kg,  $D$  the tree diameter at 1.30 m in cm,  $H$  the tree height  
64 in m and  $\rho$  the basic wood density in  $\text{g}/\text{cm}^3$ . Tree dry biomass can then be converted to  
65 carbon stock using the IPCC default carbon fraction of 0.47 (McGroddy *et al.*, 2004).

66 Different methods have been used to convert measures of wood density at 12% moisture  
67 ( $D_{12}$ ), which are often available in forestry institute databases, into basic wood density  
68 ( $D_b$ ). Based on basic wood density data and air-dry wood density data (supposedly close  
69 to 12% moisture) for 379 tropical species or genera (Chudnoff, 1984), Reyes *et al.* (1992)  
70 have proposed a linear regression between  $D_b$  and  $D_{12}$  (Eq. 1).

$$(1) \quad D_b = 0.0134 + 0.800D_{12}$$

71 This relationship has been used to estimate the basic wood densities of 223 species in  
72 Reyes *et al.* (1992), successively reported in Brown (1997), IPCC (2006) and Zanne *et al.*  
73 (2009). Sallenave (1971) has proposed another formula to compute basic wood density from  
74 the wood density at 12% moisture (Eq. 2). In this formula,  $d$  is a density conversion factor

75 per 1% change in moisture content denominated “hygroscopicity” by Sallenave (1971),  $S$  is  
76 the fibre saturation point (moisture content  $S$  in % at which wood volume starts decreasing  
77 in the drying process), and  $\nu$  is the variation in volume on a dry basis per 1% change in  
78 moisture content (in %/%). The values of  $d$ ,  $\nu$ , and  $S$  vary between species and individual  
79 trees. Sallenave (1955; 1964; 1971) published values of  $D_{12}$ ,  $d$ ,  $\nu$ , and  $S$  for 1893 trees  
80 sampled worldwide in tropical forests.

$$(2) \quad D_b = \frac{D_{12} - 12d}{1 + (\nu/100)(S - 12)}$$

81 Using Sallenave’s data and formula, it is possible to compute  $D_{b,i}$  for each wood sample  
82  $i$  and estimate the conversion factor  $\alpha_{12}$  between wood density at 12% moisture and basic  
83 wood density from the following statistical model:  $D_{b,i} = \alpha_{12}D_{12,i} + \varepsilon_i$ , assuming a normal  
84 error term  $\varepsilon_i \sim \mathcal{Normal}(0, \sigma^2)$ . Using the wood samples of the Sallenave data-set, Chave  
85 *et al.* (2006) obtained a value of 0.872 for the conversion factor  $\alpha_{12}$  between  $D_{12}$  and  
86  $D_b$ . Several studies have since used Sallenave’s method to derive conversion factors for  
87 particular sets of species (Muller-Landau, 2004) or to convert wood density at a particular  
88 moisture content  $w$  into basic wood density (Bastin *et al.*, 2015; Chave *et al.*, 2009; Swenson  
89 & Enquist, 2007) by extending Sallenave’s original formula assuming that  $D_b = (D_w -$   
90  $wd)/(1 + (\nu/100)(S - w))$ . The resulting conversion factor was close to 0.872. Notably,  
91 Chave *et al.* (2009) used a value of 0.861 (see supplementary material of the cited reference)  
92 to convert any wood density between 10-18% moisture content into basic wood density.  
93 The estimated basic wood densities were included in the Global Wood Density Database,  
94 a large global compilation of wood density data (Chave *et al.*, 2009; Zanne *et al.*, 2009).  
95 This database combines measured (40% of the data) and inferred (60% of the data) basic  
96 wood densities. It has been extensively used to compute forest biomass and carbon stock

97 with the aim of studying the role of forest in the global carbon cycle (Avitabile *et al.*,  
98 2016; Baccini *et al.*, 2012, 2017; Saatchi *et al.*, 2011; Vieilledent *et al.*, 2016) or addressing  
99 questions in functional ecology (Baraloto *et al.*, 2010; Chave *et al.*, 2009; Kunstler *et al.*,  
100 2016).

101 Simpson (1993) proposed a simplified formula to compute wood density at any moisture  
102 content from basic wood density. With this formula, the relationship only depends on the  
103 moisture content  $w$ :  $D_w = D_b(1 + w/100)/(1 - 0.265aD_b)$ , with  $a = 1 - w/30$ . Simpson's  
104 formula can be inverted to compute  $D_b$  from  $D_w$  (Eq. 3).

$$(3) \quad D_b = 1/(0.265a + (100 + w)/(100D_w))$$

105 Two assumptions were made to derive this formula, (i) the fibre saturation point  $S$  can  
106 be approximated to 30% for all tree species, and (ii) the total volumetric shrinkage  $R_T$  (in  
107 %) from  $S$  to 0% moisture content is proportional to the basic wood density  $D_b$ , and can  
108 be approximated by the following relationship (Stamm, 1964):  $R_T/100 = 0.265D_b$ .

109 Because relationships proposed by Reyes *et al.* (1992), Sallenave (1971) and Simpson  
110 (1993) give significantly different estimates of the basic wood density for a same value of  
111 wood density at 12% moisture, it is important to further test their underlying theories.

112 In this study, we present a new and exact formula to convert wood density at any  
113 moisture content into basic wood density. The formula is derived from the definitions of  
114 the fibre saturation point and the volumetric shrinkage coefficient. We compare this new  
115 formula with formulas provided by Reyes, Sallenave and Simpson, and explain why they  
116 differ. We combine our theoretical formula with the latest version of a wood technology  
117 database compiled by Cirad (the French agricultural research and international cooperation  
118 organization) to estimate a new conversion factor between density at 12% moisture and

119 basic wood density. We finally discuss the consequences of this new conversion factor in  
120 carbon cycle research and ecology.

## 121 MATERIALS AND METHODS

### 122 *The Cirad wood technology database –*

#### 123 *A global database including 872 tree species –*

124 The Cirad wood technology database includes data from 4022 trees. Tree species names  
125 (latin binomial) were first spell-checked with the Global Names Resolver available in the  
126 `taxize` R package (Chamberlain & Szöcs, 2013) using The Encyclopedia of Life, The  
127 International Plant Names Index, and the Tropicos databases as references. Then, we  
128 searched for synonyms in the list of species names and corrected the species names when  
129 necessary using The Plant List version 1.1 (<http://www.theplantlist.org>) as reference.  
130 We used the `Taxonstand` R package (Cayuela *et al.*, 2017) to do so. Taxonomic families  
131 were retrieved from updated species names using The Plant List. Trees belong to 1010  
132 taxa from 484 genera and 94 taxonomic families. Most of the taxa (872) were identified  
133 up to the species level, with varieties and subspecies combined. Out of the 872 species  
134 names, 832 were “accepted” species names and 40 were “unresolved”, according to The  
135 Plant List. The rest of the taxa (138) were identified up to the genus level. The dataset  
136 includes 834 angiosperm species and 38 gymnosperm species. The dataset includes trees  
137 from 64 countries but the major part of the trees come from 13 tropical countries (countries  
138 with more than 20 tree species), mostly in South America, Africa, and in Oceanic islands  
139 (Table 1 and Fig. 1). Sallenave was working for a tropical forestry institute now part of  
140 Cirad, the database is thus the direct continuation and extension of Sallenave’s work (1955;  
141 1964; 1971).

### 142 *Measuring wood mass, moisture content, and volume –*

143 The volume  $V_w$  and mass  $m_w$  of a wood sample depend on its water content  $w$ . The moisture  
144 content of wood is a function of both relative humidity and temperature of ambient air



145 (Glass & Zelinka, 2010; Hailwood & Horrobin, 1946). In the Cirad database, wood volume  
146 and mass measurements were done in the same laboratory following the French standard  
147 AFNOR NF B51-005 (09/1985). Wood samples are cubes of about 20 mm side ( $\pm 0.5$  mm).  
148 To measure  $V_w$  and  $m_w$ , wood samples were put under controled and fixed atmospheric  
149 conditions to reach a water content  $w$ . Wood samples were supposed to be stabilized when  
150 their variation in mass (in g) after four hours was less than 0.5%.

151 Wood mass  $m_w$  (in g) was measured with a 0.01 g precision balance. The exact moisture  
152 content  $w$  (in %) of a wood sample is defined as a percentage of the dry mass,  $w =$   
153  $100(m_w - m_0)/m_0$ , with  $m_0$  being the mass of the wood sample at the anhydrous state  
154 and  $m_w$  being the mass of the wood at moisture content  $w$ .

155 Wood volume  $V_w$  (in  $\text{cm}^3$ ) was measured with three different methods. For wood sam-  
156 ples of irregular dimensions, we used a mercury volumenometer, or the water displacement  
157 method based on Archimede's principle (Williamson & Wiemann, 2010). The mercury vol-  
158 umenometer for volume measurement was progressively abandoned from the end of years  
159 90s due to mercury toxicity. For perfectly rectangular parallelepiped or cubic wood sam-  
160 ples, a stereometric method was used to measure the wood cube size in the three dimensions  
161 using a digital caliper having a 0.02 mm precision. Using one of these three methods, wood  
162 volume was measured with a precision  $<0.003 \text{ cm}^3$ .

163 *Measuring fibre saturation point, volumetric shrinkage coefficient, and wood density at 12%*  
164 *moisture –*

165 The fibre saturation point  $S$  (in %) is commonly defined as the water content above which  
166 the wood volume does not increase (Skaar, 1988). Water can exist in wood as liquid water  
167 (“free” water) or water vapor in cell lumens and cavities, and as water held chemically  
168 within cell walls (“bound” water). The fibre saturation point is the point in the wood drying  
169 process at which the only remaining water is that “bound” to the cell walls. Further drying

170 of the wood results in the strengthening of the wood fibres, and is usually accompanied by  
171 shrinkage (Skaar, 1988).

172 To estimate the fibre saturation point  $S$ , we first measured wood volume at the satu-  
173 rated state  $V_S$  using the water displacement method. To reach a state saturated in water,  
174 which  $w > S$ , wood samples were autoclaved, subjected to one hour of vacuum (to accel-  
175 erate water impregnation) and then soaked in water during 15 hours at 5 bar pressure.  
176 Then, wood samples were stabilized at four decreasing moisture contents  $w$  until reaching  
177 the anhydrous state. First, wood samples were put in a stove at 30°C temperature and 85%  
178 humidity to reach a moisture content close to 18%. Second, wood samples were put in an  
179 air-conditioned room at 20°C temperature and 65% humidity to reach a moisture content  
180 close to 12%. Third, they were put in a stove at 20°C temperature and 50% humidity to  
181 reach a moisture content close to 9%. Fourth, they were put in a stove at 103°C to reach  
182 the anhydrous state. Wood mass  $m_w$  and wood volume  $V_w$  were measured at each of the  
183 four stabilized stages. The exact water content  $w$  at the three stabilized states previous to  
184 the anhydrous state was computed from the mass  $m_w$  and the anhydrous mass  $m_0$ . Three  
185 volumetric shrinkage values  $\Delta V/V = 100(V_S - V_w)/V_S$  were computed between the satu-  
186 rated state and the three other stabilized states. The fibre saturation point  $S$  was defined  
187 as the intercept of the linear model  $w = S + b \times \Delta V/V$  (Stamm, 1964). To minimise the  
188 errors in estimating  $S$ , only the relationships with a coefficient of determination  $r^2 > 98\%$   
189 were considered.

190 The volumetric shrinkage coefficient  $R$  (in %/%) is the variation in volume per 1%  
191 change in water content. The total volumetric shrinkage  $R_T$  of the wood samples from  
192 the saturated state to the anhydrous state (in %) was computed from  $V_S$  and  $V_0$ :  $R_T =$   
193  $100(V_S - V_0)/V_S$ . Then, the volumetric shrinkage coefficient  $R$  (in %/%) was estimated from  
194  $R_T$  and the fibre saturation point  $S$ :  $R = R_T/S$ . This definition of the volumetric shrinkage  
195 coefficient differs from the one used in Sallenave's work. Sallenave used the anhydrous

196 volume  $V_0$  as the reference volume and  $\nu$  was defined as  $\nu = B/S$  with  $B = 100(V_S - V_0)/V_0$ .  
197 Because this definition corresponded to wood swelling and not to wood shrinkage, it has  
198 been changed when compiling the new Cirad wood technology database. Sallenave's  $B$   
199 values were converted to  $R_T$  values with the following formula derived from the definitions  
200 of  $B$  and  $R_T$ :  $R_T = 100(1 - 1/(B/100 + 1))$ .

201 Wood density at 12% moisture ( $D_{12}$  in  $\text{g}/\text{cm}^3$ ) was obtained computing the ratio  $m_w/V_w$   
202 with  $w$  close to 12% moisture (when wood samples were stabilized at 20°C temperature  
203 and 65% humidity). Because the moisture content  $w$  was not exactly 12%, densities were  
204 initially corrected using the “hygroscopicity” term  $d$  defined by Sallenave and the following  
205 formula  $D_{12} = D_w - (w - 12)d$  (Sallenave, 1971). This correction affected only the third  
206 decimal of the wood density value, so it was progressively abandoned. Given the precision  
207 of wood mass and volume measurements (see sec. ), uncertainty regarding wood densities  
208 at 12% moisture for individual samples was considered to be of about  $0.01 \text{ g}/\text{cm}^3$ .

209 In the Cirad database, average values for  $S$ ,  $R$  and  $D_{12}$  for each tree were historically  
210 recorded using  $>10$  wood samples taken at various positions in the trunk. Out of the 4022  
211 trees present in the Cirad database, 190 trees had only measurements for  $D_{12}$ , with no  
212 values for  $S$  and  $R$ . Definitions and units of wood physical and mechanical properties used  
213 in the present study are all summarized in Appendix S1 (see the Supplementary Data with  
214 this article).

### 215 *Model relating $D_w$ and $D_b$ –*

216 Using  $D_w$  (the wood density at moisture content  $w$ ),  $R$  (the newly defined volumetric  
217 shrinkage coefficient), and  $S$  (the fibre saturation point), we derived a new relationship  
218 linking the basic wood density  $D_b$  with  $D_w$ . We first considered the relationship between  
219  $V_S$  and  $V_w$ . The volumetric shrinkage coefficient  $R$  (variation in volume per 1% change in  
220 water content) is defined as  $R = (100\Delta V)/(V\Delta w)$ . Let's consider a wood sample saturated

221 in water ( $w = S$ ) that would be dried until reaching a water content  $w$ . The volume of the  
222 wood sample would decrease (wood shrinkage) and  $R$  can be written as:

$$(4) \quad R = (100(V_S - V_w))/(V_S(S - w))$$

223 Using Eq. 4, we can express  $V_S$  as a function of  $V_w$ ,  $R$ ,  $S$  and  $w$ :

$$(5) \quad V_S = V_w/(1 - (R/100)(S - w))$$

224 We then considered the relationship between  $m_0$  and  $m_w$ . Water content  $w$  is defined  
225 as  $w = 100(m_w - m_0)/m_0$ . Using this definition, we expressed  $m_0$  as a function of  $m_w$  and  
226  $w$ :

$$(6) \quad m_0 = m_w/(1 + w/100)$$

227 Following the definition of the basic wood density  $D_b$  ( $D_b = m_0/V_S$ ,  $D_b$ ), and replacing  
228  $V_S$  and  $m_0$  by their expressions in Eq. 5 and Eq. 6 respectively, we obtained  $D_b = (m_w/(1 +$   
229  $w/100))((1 - (R/100)(S - w))/V_w)$ . Given that  $D_w = m_w/V_w$ , we found the following  
230 relationship between  $D_b$  and  $D_w$ :

$$(7) \quad D_b = \frac{1 - (R/100)(S - w)}{1 + w/100} D_w$$

231 For each individual tree  $i$ , we used this new formula to compute the basic wood density

232  $D_{b,i}$  from the values of  $D_{12,i}$  (wood density at 12% moisture),  $R_i$ , and  $S_i$  reported for 3832  
233 trees in the Cirad wood technology database (190 trees had no values for  $R$  or  $S$ ). We  
234 then estimated the parameters of a statistical linear regression model linking  $D_{b,i}$  to  $D_{12,i}$ ,  
235 where parameter  $\alpha_{12}$  corresponds to the conversion factor between  $D_{12}$  and  $D_b$  (Eq. 8).

$$(8) \quad D_{b,i} = \alpha_{12}D_{12,i} + \varepsilon_i, \varepsilon_i \sim N(0, \sigma^2)$$

236 We extended this approach to compute an additional conversion factor  $\alpha_{15}$  between  $D_{15}$ ,  
237 the wood density at 15% moisture (which was the French standard before international  
238 conventions fixed the moisture content at 12%, see Sallenave (1955)) and  $D_b$ . We inverted  
239 Eq. 7 to compute  $D_{15,i}$  from previously computed  $D_{b,i}$  values and estimated the slope of a  
240 linear regression model linking  $D_{b,i}$  to  $D_{15,i}$ .

### 241 *Comparison with the Global Wood Density Database –*

242 The Global Wood Density Database (GWDD, [http://hdl.handle.net/10255/dryad.](http://hdl.handle.net/10255/dryad.235)  
243 235) provides wood densities for 8412 species from around the world (Chave *et al.*, 2009;  
244 Zanne *et al.*, 2009). The GWDD and Cirad wood density databases share common wood  
245 samples and measurements from Sallenave (1955, 1964, 1971). We quantified the amount of  
246 novel information in the Cirad wood density database. We identified and computed (i) the  
247 number of species studied by Sallenave and present in the two databases, (ii) the number  
248 of species common to the two databases but not studied by Sallenave (for which wood  
249 density values were independent), and (iii) the number of species in the Cirad database  
250 not present in the GWDD. For the species shared between databases, and with independent  
251 measurements, we compared the mean basic wood density values in the two databases. To  
252 quantify the differences between the two databases, we computed the Pearson correlation

253 coefficient between the two values, a measure of the linear correlation (dependence), and  
254 the coefficient of variation (in %) between the two databases. The coefficient of variation  
255 is the ratio of the standard deviation of the differences between density values in the two  
256 databases divided by the mean basic wood density in the Cirad database. It is a measure  
257 of the average difference between the wood density values in the two databases. Finally,  
258 we quantified the bias (in %) in the GWDD compared to the Cirad database. This bias  
259 was defined as the mean difference between density values in the two databases divided by  
260 the mean basic wood density in the Cirad database.

## 261 RESULTS

### 262 *Relationship between $D_b$ and $D_w$ –*

263 The linear regression model linking  $D_b$  and  $D_{12}$  had a coefficient of determination  $r^2 =$   
264 0.999 and a residual standard error of 0.015 g/cm<sup>3</sup> (Fig. 2). We estimated a new conversion  
265 factor  $\alpha_{12} = 0.828$  based on the slope estimate of the linear regression. Thus, the basic  
266 wood density can be estimated from wood density at 12 % moisture from Eq. 9.

$$(9) \quad [D_b]_{\text{est}} = 0.828D_{12}$$

267 With this new conversion factor, we were able to compute the basic wood density  $D_b$   
268 from  $D_{12}$  for the 190 trees without values for  $R$  or  $S$ . At the species level, when accounting  
269 for all the trees in the data-base,  $D_b$  ranged from 0.191 to 1.105 g/cm<sup>3</sup> (Table 2).

270 We also observed that  $R$ ,  $S$  and  $D_{12}$  were not independant (Fig. 3). Thus, it is not  
271 possible to directly estimate the conversion factor from the means of  $R$  and  $S$  on the basis  
272 of the formula we derived to link basic wood density to wood density at moisture content  
273  $w$  (Eq. 7). Instead, the conversion factor estimated with the linear regression model must  
274 be used.

275 The linear regression model linking  $D_b$  and  $D_{15}$  had a coefficient of determination  
276  $r^2 = 0.999$  and a residual standard error of 0.014 g/cm<sup>3</sup>. We estimated a conversion factor  
277  $\alpha_{15} = 0.819$  between  $D_{15}$  and  $D_b$ .

### 278 *Comparison with the Global Wood Density Database –*

279 Out of the 872 species in the Cirad wood density database, we identified 260 species that  
280 have been measured by Sallenave (1955, 1964, 1971) and for which one or more samples were

281 already included in the GWDD. For these species, the Cirad database provides additional  
282 information compared to the GWDD, with values for  $R$ ,  $S$ , and  $D_{12}$ . We also identified 411  
283 species common to the two databases but for which measurements of  $D_b$  were completely  
284 independant. For these species, the Cirad wood density database also provides  $R$ ,  $S$ , and  
285  $D_{12}$  values. Finally, we identified 201 original species in the Cirad database which were  
286 not present in the GWDD. Both  $R$  and  $S$  were highly variable among species (Table 2).  
287 In particular,  $S$  ranged from 17 to 41% with a mean of 27.93% and a standard deviation  
288 of 4.06%.

289 Using the independent measurements for the 411 common species in the two databases,  
290 we estimated a Pearson correlation coefficient of 86% and a coefficient of variation of 13.69%  
291 (Fig. 4). We also observed that, on average,  $D_b$  values in the GWDD were 3.05% higher  
292 compared to  $D_b$  values in the Cirad database.



## 293 DISCUSSION

### 294 *Relationship between $D_b$ and $D_{12}$* –

295 We found a new value of 0.828 for the conversion factor between the wood density at 12%  
296 moisture and the basic wood density. This value is 5% lower compared to the value of  
297 0.872 used by [Chave \*et al.\* \(2006\)](#) and based on Sallenave’s data and formula. To compare  
298 this value with the results obtained by [Reyes \*et al.\* \(1992\)](#), we derived the expectation  
299  $\mathbb{E}(D_b/D_{12})$  from Reyes’ formula  $D_b = 0.0134 + 0.800D_{12}$ . We obtained  $\mathbb{E}(D_b/D_{12}) =$   
300  $0.0134 \times \mathbb{E}(1/D_{12}) + 0.800$ . This led to an estimate of 0.821 for the conversion factor. This  
301 value is much closer to our value of 0.828 than the value of 0.872 ([Chave \*et al.\*, 2006](#)).

302 Why was the conversion factor overestimated in [Chave \*et al.\* \(2006\)](#)? As calculations  
303 were based on the formula from [Sallenave \(1971\)](#), we decided to re-examine its derivation.  
304 When looking more closely at Sallenave’s own example page 11 in [Sallenave \(1971\)](#), a  
305 discrepancy became apparent. For the African tree species *Khaya ivorensis* (with  $D_{12} =$   
306  $0.57 \text{ g/cm}^3$ ,  $d = 0.0030$ ,  $S = 24\%$ ,  $\nu = 0.46$  and measured  $D_b = 0.483 \text{ g/cm}^3$ ), Sallenave’s  
307 formula (Eq. 2) led to an estimate of  $0.506 \text{ g/cm}^3$  for the basic wood density. Our formula,  
308 on the other hand, gave an estimate of  $0.484 \text{ g/cm}^3$  which is much closer to the measured  
309 basic wood density value of  $0.483 \text{ g/cm}^3$ . Given these findings, we suspected an error or  
310 approximation in Sallenave’s formula.

311 Based on the definition of the basic wood density  $D_b = m_0/V_S$  and the definition of the  
312 parameters used by [Sallenave \(1971\)](#), we demonstrate that Sallenave’s formula is true only  
313 if  $V_0 = V_{12}$  (Eq. 10 and demonstration in Appendix S2). This, however, is a too strong  
314 assumption if we want to estimate an accurate conversion factor.

$$(10) \quad D_b = \frac{V_0[D_{12} - 12d]}{V_{12}[1 + (\nu/100)(S - 12)]}$$

315 We thus recommend the use of the new formula we derived in this study (Eq. 7) to  
316 compute individual basic wood density  $D_b$  from  $D_{12}$ , the wood density at 12% moisture,  
317 when  $R$  and  $S$  are available. This formula is more appropriate than Sallenave's one. It  
318 does not only avoid making the strong assumption that  $V_0 = V_{12}$ , but also needs only two  
319 parameters to compute  $D_b$  compared to Sallenave's formula which also includes a third  
320 parameter, the "hygroscopicity"  $d$ . Moreover, the new formula, unlike Sallenave's one,  
321 implies  $D_0 = 0$  when  $D_{12} = 0$ , which is physically consistent. Finally, the new formula we  
322 derived in this study is more generic than Reyes' and Sallenave's original formula. It can  
323 be used, together with the data-set on wood properties we provide as supplementary data,  
324 to derive conversion factors between  $D_b$  and density  $D_w$  at any water content  $w$  under the  
325 fibre saturation point  $S$ .

326 We also demonstrate that our formula is more appropriate than Simpson's one. As-  
327 sumptions used to derive Simpson's formula are not supported by our data. In the Cirad  
328 database, the fibre saturation point  $S$  is highly variable between species and cannot be  
329 assumed constant at 30%. We also estimated a coefficient of 0.201 for the relationship be-  
330 tween  $R_T/100$  and  $D_b$ , a value different from the coefficient of 0.265 suggested by Stamm  
331 (1964). We estimated a mean error (coefficient of variation of the root-mean-square-error)  
332 of 26% for  $R_T/100$  predictions, suggesting that  $R_T/100$  cannot be precisely estimated from  
333  $D_b$  using a simple correlation coefficient (see also Fig. 3). As a consequence, Simpson's  
334 formula leads to a large under-estimation of basic wood densities for  $D_{12} > 0.7 \text{ g/cm}^3$   
335 (Fig. 2).

336 If only  $D_{12}$  and no other measurement is available, we recommend the use of the value  
337 0.828 for the conversion factor to compute the basic wood density  $D_b$ . We also recommend  
338 this value of 0.828 over the value of 0.821 obtained with Reyes' relationship. The conversion  
339 factor of 0.828 is based on a larger and more consistent database than the one used by  
340 Reyes *et al.* (1992). Database used by Reyes combined density data at the species and

341 genera level and included air-dry densities not stabilized at 12% (Chudnoff, 1984).

### 342 *Additional value of the Cirad wood density database –*

343 Using the new formula we obtained in this study (Eq. 7), the new estimated conversion  
344 factor 0.828, and the Cirad database, we estimated the basic wood density of 4022 trees  
345 belonging to 872 species (1010 taxa), 484 genus and 94 families. Compared with the  
346 Global Wood Density Database (Zanne *et al.*, 2009), we provide basic wood density for  
347 201 additional tree species. Most of the 872 species come from 13 oceanic tropical islands  
348 or countries.

349 In the Cirad wood density database, the fibre saturation point is provided for each  
350 tree. The fibre saturation point is an essential wood characteristic that can be used, in  
351 combination with the green volume, the green mass and the dry mass, to estimate the  
352 volume of water for each of the three bulk phases in a tree: (1) “free” liquid water in  
353 cell lumens and cavities, (2) water vapor in the gas-filled voids, and (3) “bound” water  
354 held chemically within cell walls (sometimes also called “solid” water, see Berry & Roderick  
355 (2005)). The volume of “bound” water is an essential plant functional trait as it determines  
356 wood strength and constraints on plant architecture (Niklas, 1993), as is the volume of  
357 “free” liquid water which is the ultimate source of the biochemical activity in living plants  
358 (Berry & Roderick, 2005).

359 Wood characteristic values for trees in the Cirad database are the average of >10 wood  
360 samples taken at various position in the trunk. These values integrate the intra-individual  
361 variability (e.g. difference in wood density values for the same tree which can vary with the  
362 position in the trunk (Bastin *et al.*, 2015)). Providing wood characteristics for individual  
363 trees, the Cirad database can be used to compute both intra-specific and inter-specific  
364 trait variability. Intra-specific trait variability, due to genetic variability and phenotypic  
365 plasticity, participates in determining species fitness and community assemblages (Albert

366 *et al.*, 2011; Courbaud *et al.*, 2012; Roughgarden, 1979). The Cirad database could also  
367 help quantify phylogenetic conservatism and divergences of wood densities in tree species  
368 (Flores & Coomes, 2011).

### 369 ***Limits and ecological perspectives of the new conversion factor*** 370 ***value*** –

371 We found a new empirical value of 0.828 for the conversion factor. This value is obtained  
372 from a theoretical equation derived from the exact definitions of  $R$ ,  $S$  and  $D_{12}$ . Some  
373 uncertainty, which comes from methodological limitations associated to the measurement  
374 of these variables, is surrounding this value. In particular, the fibre saturation point  $S$   
375 remains a theoretical concept. In practice, some “free” water is still present in wood cells  
376 when shrinkage (associated to the loss of “bound” water) starts during the drying process,  
377 and some low molecular weight organic compounds are lost during drying (Rosner *et al.*,  
378 2009). This introduces some uncertainty in the measurement of the water content at each  
379 stage of the drying process, and thus on the estimates of  $S$  and  $R$ . Also, from the field  
380 to the laboratory, wood samples might have experienced some drying during the transport  
381 and storage, which explains why wood samples had to be re-saturated. Wood that has  
382 been re-saturated can show different shrinkage behavior (Glass & Zelinka, 2010), which  
383 introduces some uncertainty regarding the measurement of  $S$  and  $R$ . Moreover, the con-  
384 version factor could theoretically vary between species or individuals having different wood  
385 anatomies. For example, the proportion of parenchyma (representing the bulk of living cells  
386 in wood) is typically higher in angiosperms, tropical, and low wood density species than  
387 in gymnosperms, temperate, and high wood density species, respectively (Morris *et al.*,  
388 2016). In our data-set, we found statistically significant differences between these groups  
389 of trees for the value of the conversion factor (Appendix S3). But the magnitude of the

390 differences between groups was of the same order ( $\leq 0.01$ ) as the uncertainty for the wood  
391 density value at 12% moisture  $D_{12}$ . So we considered these differences not meaningful.

392 This new value of 0.828 for the conversion factor has significant implications for the  
393 study of the role of forests in the global carbon cycle. The error on the conversion factor  
394 between wood density at 12% moisture and basic wood density propagates to forest carbon  
395 stock. Combined with biomass allometric equations available in the literature (Chave *et al.*,  
396 2005, 2014; Vieilledent *et al.*, 2012), these wood density values have been used to compute  
397 forest carbon maps globally (Avitabile *et al.*, 2016; Baccini *et al.*, 2012, 2017; Saatchi *et al.*,  
398 2011). About 60% of the basic wood densities in the Global Wood Density Database have  
399 been estimated with an overestimated conversion factor. On the basis of 411 tree species,  
400 we showed that the GWDD overestimates wood densities by +3.05% on average. It is  
401 hard to quantify precisely the consequences of this bias on forest carbon stock estimates  
402 as it depends on relative species abundance in the forest and relative tree size distribution  
403 between species. However, if dominant species (in terms of size and abundance) have an  
404 overestimated basic wood density, due to the use of an inaccurate conversion factor (0.872  
405 or 0.861 in Chave *et al.* (2009, 2006) against 0.828 in our study), it can potentially lead  
406 to an overestimation of 4-5% of the forest biomass and carbon stock. We are currently in  
407 the process of updating the GWDD and the present study provides a firm basis for this  
408 revision.

409 This study will also provide a firmer basis for future ecological research on wood density  
410 as a functional trait. Indeed, wood density is often considered as a key tree functional trait  
411 determining species performance and fitness (Baraloto *et al.*, 2010; Chave *et al.*, 2009;  
412 Díaz *et al.*, 2016; Greenwood *et al.*, 2017; Kunstler *et al.*, 2016). For example, recent  
413 global studies have demonstrated that values of wood density explained the competition  
414 outcome between pairs of tree species (Kunstler *et al.*, 2016), and that drought-induced  
415 mortality was promoted by lower wood densities (Greenwood *et al.*, 2017). Using a wood

416 density database with unbiased values of basic wood densities would allow proper estimates  
417 of species' differences with regards to this trait and predict better the dynamics of tree  
418 species community.

## 419 **Acknowledgments**

420 Authors thank G. Bruce Williamson and another anonymous reviewer for their relevant  
421 remarks and constructive comments on a previous version of the manuscript. Authors  
422 warmly thank all the researchers, technicians and students who have intensively and ac-  
423 curately measured wood properties of thousands of trees and hundreds of species from the  
424 tropical forests at the “*Centre Technique Forestier Tropical*” and Cirad since the 1950s.  
425 They thank in particular Pierre Sallenave who made a considerable contribution to re-  
426 search in describing protocols and compiling data on wood properties in his three volumes  
427 (Sallenave, 1955, 1964, 1971). GV was funded by Cirad and through the European Com-  
428 mission ReCaREDD project at the Joint Research Center. This work has benefitted from  
429 “*Investissement d’Avenir*” grants managed by Agence Nationale de la Recherche (CEBA:  
430 ANR-10-LABX-25-01; TULIP: ANR-10-LABX-0041).

## 431 **Author Contributions**

432 GV, FF, JC, and JG conceived the ideas and designed methodology; DG, PL, and JG  
433 collected the data; GV and FF analysed the data; GV led the writing of the manuscript.  
434 All authors contributed critically to the drafts and gave final approval for publication.

## 435 **Data Accessibility Statement**

436 Data (including the Cirad wood density database) and R script associated to the present  
437 study have been archived on the Cirad Dataverse research data repository ([http://dx.](http://dx.doi.org/10.18167/DVN1/KRVFOE)  
438 [doi.org/10.18167/DVN1/KRVFOE](http://dx.doi.org/10.18167/DVN1/KRVFOE)) (Vieilledent *et al.*, 2018).

## 439 Literature Cited

- 440 Achard, F., Beuchle, R., Mayaux, P., Stibig, H.J., Bodart, C., Brink, A., Carboni, S. *et al.*  
441 (2014) Determination of tropical deforestation rates and related carbon losses from 1990  
442 to 2010. *Global Change Biology*, **20**, 2540–2554.
- 443 Albert, C.H., Grassein, F., Schurr, F.M., Vieilledent, G. & Violle, C. (2011) When and how  
444 should intraspecific variability be considered in trait-based plant ecology? *Perspectives*  
445 *in Plant Ecology, Evolution and Systematics*, **13**, 217–225.
- 446 Avitabile, V., Herold, M., Heuvelink, G., Lewis, S.L., Phillips, O.L., Asner, G.P., Armston,  
447 J. *et al.* (2016) An integrated pan-tropical biomass map using multiple reference datasets.  
448 *Global change biology*.
- 449 Baccini, A., Goetz, S.J., Walker, W.S., Laporte, N.T., Sun, M., Sulla-Menashe, D., Hackler,  
450 J. *et al.* (2012) Estimated carbon dioxide emissions from tropical deforestation improved  
451 by carbon-density maps. *Nature Climate Change*, **2**, 182–185.
- 452 Baccini, A., Walker, W., Carvalho, L., Farina, M., Sulla-Menashe, D. & Houghton, R.A.  
453 (2017) Tropical forests are a net carbon source based on aboveground measurements of  
454 gain and loss. *Science*.
- 455 Baraloto, C., Paine, C.E.T., Poorter, L., Beauchene, J., Bonal, D., Domenach, A.M.,  
456 Hérault, B. *et al.* (2010) Decoupled leaf and stem economics in rain forest trees. *Ecology*  
457 *Letters*, **13**, 1338–1347.
- 458 Bastin, J.F., Fayolle, A., Tarelkin, Y., Van den Bulcke, J., de Haulleville, T., Mortier,  
459 F., Beeckman, H. *et al.* (2015) Wood specific gravity variations and biomass of central  
460 african tree species: The simple choice of the outer wood. *PLOS ONE*, **10**, 1–16.
- 461 Berry, S.L. & Roderick, M.L. (2005) Plant-water relations and the fibre saturation point.  
462 *New Phytologist*, **168**, 25–37.
- 463 Brown, S. (1997) Estimating biomass and biomass change of tropical forests: a primer.  
464 Technical report, FAO Forestry Paper 134, Rome, Italy.
- 465 Cayuela, L., Stein, A. & Oksanen, J. (2017) *Taxonstand: Taxonomic Standardization of*  
466 *Plant Species Names*. R package version 2.1.
- 467 Chamberlain, S. & Szöcs, E. (2013) taxize - taxonomic search and retrieval in R.  
468 *F1000Research*, **2**:191.
- 469 Chave, J., Andalo, C., Brown, S., Cairns, M.A., Chambers, J.Q., Eamus, D., Folster, H.  
470 *et al.* (2005) Tree allometry and improved estimation of carbon stocks and balance in  
471 tropical forests. *Oecologia*, **145**, 87–99.



- 472 Chave, J., Coomes, D., Jansen, S., Lewis, S.L., Swenson, N.G. & Zanne, A.E. (2009)  
473 Towards a worldwide wood economics spectrum. *Ecology Letters*, **12**, 351–366.
- 474 Chave, J., Muller-Landau, H.C., Baker, T.R., Easdale, T.A., Steege, H.t. & Webb, C.O.  
475 (2006) Regional and phylogenetic variation of wood density across 2456 neotropical tree  
476 species. *Ecological applications*, **16**, 2356–2367.
- 477 Chave, J., Réjou-Méchain, M., Búrquez, A., Chidumayo, E., Colgan, M.S., Delitti, W.B.,  
478 Duque, A. *et al.* (2014) Improved allometric models to estimate the aboveground biomass  
479 of tropical trees. *Global Change Biology*, **20**, 3177–3190.
- 480 Chudnoff, M. (1984) *Tropical Timbers of the World*. Agriculture handbook. U.S. Depart-  
481 ment of Agriculture, Forest Service.
- 482 Courbaud, B., Vieilledent, G. & Kunstler, G. (2012) Intra-specific variability and the  
483 competition-colonisation trade-off: coexistence, abundance and stability patterns. *The-*  
484 *oretical Ecology*, **5**, 61–71.
- 485 Díaz, S., Kattge, J., Cornelissen, J.H.C., Wright, I.J., Lavorel, S., Dray, S., Reu, B. *et al.*  
486 (2016) The global spectrum of plant form and function. *Nature*, **529**, 167–171.
- 487 Flores, O. & Coomes, D.A. (2011) Estimating the wood density of species for carbon stock  
488 assessments. *Methods in Ecology and Evolution*, **2**, 214–220.
- 489 Glass, S.V. & Zelinka, S.L. (2010) Moisture relations and physical properties of wood.  
490 wood handbook : wood as an engineering material: chapter 4. centennial ed. general  
491 technical report fpl ; gtr-190. Technical report, Madison, WI : U.S. Dept. of Agriculture,  
492 Forest Service, Forest Products Laboratory.
- 493 Greenwood, S., Ruiz-Benito, P., Martínez-Vilalta, J., Lloret, F., Kitzberger, T., Allen,  
494 C.D., Fensham, R. *et al.* (2017) Tree mortality across biomes is promoted by drought  
495 intensity, lower wood density and higher specific leaf area. *Ecology Letters*, **20**, 539–553.
- 496 Hailwood, A. & Horrobin, S. (1946) Absorption of water by polymers: analysis in terms  
497 of a simple model. *Transactions of the Faraday Society*, **42**, B084–B092.
- 498 IPCC (2006) Guidelines for national greenhouse gas inventories, prepared by the national  
499 greenhouse gas inventories programme. Technical report, The Intergovernmental Panel  
500 on Climate Change, IPCC/IGES, Japan.
- 501 Kunstler, G., Falster, D., Coomes, D.A., Hui, F., Kooyman, R.M., Laughlin, D.C., Poorter,  
502 L. *et al.* (2016) Plant functional traits have globally consistent effects on competition.  
503 *Nature*, **529**, 204–207.
- 504 Lachenbruch, B. & McCulloh, K.A. (2014) Traits, properties, and performance: how woody  
505 plants combine hydraulic and mechanical functions in a cell, tissue, or whole plant. *New*  
506 *Phytologist*, **204**, 747–764.

- 507 McGroddy, M.E., Daufresne, T. & Hedin, L.O. (2004) Scaling of C:N:P stoichiometry in  
508 forests worldwide: implications of terrestrial redfield-type ratios. *Ecology*, **85**, 2390–2401.
- 509 Morris, H., Plavcová, L., Cvecko, P., Fichtler, E., Gillingham, M.A.F., Martínez-Cabrera,  
510 H.I., McGlenn, D.J. *et al.* (2016) A global analysis of parenchyma tissue fractions in  
511 secondary xylem of seed plants. *New Phytologist*, **209**, 1553–1565.
- 512 Muller-Landau, H.C. (2004) Interspecific and inter-site variation in wood specific gravity  
513 of tropical trees. *Biotropica*, **36**, 20–32.
- 514 Niklas, K.J. (1993) Influence of tissue density-specific mechanical properties on the scaling  
515 of plant height. *Annals of Botany*, **72**, 173–179.
- 516 Pan, Y., Birdsey, R.A., Fang, J., Houghton, R., Kauppi, P.E., Kurz, W.A., Phillips, O.L.  
517 *et al.* (2011) A large and persistent carbon sink in the world's forests. *Science*, **333**,  
518 988–993.
- 519 Reyes, G., Brown, S., Chapman, J. & Lugo, A.E. (1992) Wood densities of tropical tree  
520 species. *General Technical Report - Southern Forest Experiment Station, USDA Forest*  
521 *Service*, pp. i + 15 pp.
- 522 Rosner, S., Karlsson, B., Konnerth, J. & Hansmann, C. (2009) Shrinkage processes in  
523 standard-size norway spruce wood specimens with different vulnerability to cavitation.  
524 *Tree Physiology*, **29**, 1419–1431.
- 525 Roughgarden, J. (1979) *Theory of population genetics and evolutionary ecology: an intro-*  
526 *duction*. Macmillan New York NY United States 1979.
- 527 Saatchi, S.S., Harris, N.L., Brown, S., Lefsky, M., Mitchard, E.T.A., Salas, W., Zutta,  
528 B.R. *et al.* (2011) Benchmark map of forest carbon stocks in tropical regions across  
529 three continents. *Proceedings of the National Academy of Sciences*, **108**, 9899–9904.
- 530 Sallenave, P. (1955) Propriétés physiques et mécaniques des bois tropicaux de l'Union  
531 française. <https://doi.org/10.18167/agritrop/00359>. Technical report, Nogent-sur-  
532 Marne, France.
- 533 Sallenave, P. (1964) Propriétés physiques et mécaniques des bois tropicaux. Premier  
534 supplément. <https://doi.org/10.18167/agritrop/00357>. Technical report, Nogent-  
535 sur-Marne, France.
- 536 Sallenave, P. (1971) Propriétés physiques et mécaniques des bois tropicaux. Deuxième  
537 supplément. <https://doi.org/10.18167/agritrop/00358>. Technical report, Nogent-  
538 sur-Marne, France.
- 539 Shmulsky, R. & Jones, P. (2011) *Forest Products and Wood Science*. Wiley.

- 540 Simpson, W.T. (1993) Specific gravity, moisture content, and density relationship for wood.  
541 Technical report.
- 542 Skaar, C. (1988) *Wood-water relations*. Springer-Verlag.
- 543 Stamm, A. (1964) *Wood and cellulose science*. Ronald Press Co.
- 544 Swenson, N.G. & Enquist, B.J. (2007) Ecological and evolutionary determinants of a key  
545 plant functional trait: wood density and its community-wide variation across latitude  
546 and elevation. *American Journal of Botany*, **94**, 451–459.
- 547 Thibaut, B., Gril, J. & Fournier, M. (2001) Mechanics of wood and trees: some new  
548 highlights for an old story. *Comptes Rendus de l'Académie des Sciences - Series IIB -*  
549 *Mechanics*, **329**, 701 – 716.
- 550 Vieilledent, G., Vaudry, R., Andriamanohisoa, S.F.D., Rakotonarivo, O.S., Randrianasolo,  
551 H.Z., Razafindrabe, H.N., Rakotoarivony, C.B. *et al.* (2012) A universal approach to  
552 estimate biomass and carbon stock in tropical forests using generic allometric models.  
553 *Ecological Applications*, **22**, 572–583.
- 554 Vieilledent, G., Fischer, F.J., Chave, J., Guibal, D., Langbour, P. & Gérard, J. (2018)  
555 Code and data for: New formula and conversion factor to compute tree species basic  
556 wood density from a global wood technology database. *CIRAD Dataverse*, [http://dx.](http://dx.doi.org/10.18167/DVN1/KRVFOE)  
557 [doi.org/10.18167/DVN1/KRVFOE](http://dx.doi.org/10.18167/DVN1/KRVFOE).
- 558 Vieilledent, G., Gardi, O., Grinand, C., Burren, C., Andriamanjato, M., Camara, C.,  
559 Gardner, C.J. *et al.* (2016) Bioclimatic envelope models predict a decrease in tropical  
560 forest carbon stocks with climate change in madagascar. *Journal of Ecology*, **104**, 703–  
561 715.
- 562 Violle, C., Navas, M.L., Vile, D., Kazakou, E., Fortunel, C., Hummel, I. & Garnier, E.  
563 (2007) Let the concept of trait be functional! *Oikos*, **116**, 882–892.
- 564 Westoby, M. & Wright, I.J. (2006) Land-plant ecology on the basis of functional traits.  
565 *Trends in Ecology & Evolution*, **21**, 261 – 268.
- 566 Williamson, G.B. & Wiemann, M.C. (2010) Measuring wood specific gravity ... correctly.  
567 *American Journal of Botany*, **97**, 519–524.
- 568 Zanne, A., Lopez-Gonzalez, G., Coomes, D., Ilic, J., Jansen, S., Lewis, S., Miller, R. *et al.*  
569 (2009) Data from: Towards a worldwide wood economics spectrum. *Dryad*, [https:](https://doi.org/10.5061/dryad.234)  
570 [//doi.org/10.5061/dryad.234](https://doi.org/10.5061/dryad.234).

## 571 Tables

Table 1: **Countries with the highest number of tree species (>20) in the Cirad wood density database.** The dataset includes values from 64 countries but the major part of the measurements of wood physical and mechanical properties has been done in tropical countries in South America, Africa and tropical Oceanic islands.

| Country                  | <i>n</i> species |
|--------------------------|------------------|
| <b>South America</b>     |                  |
| Brazil                   | 108              |
| French Guiana            | 168              |
| <b>Africa</b>            |                  |
| Burundi                  | 29               |
| Cameroon                 | 83               |
| Central African Republic | 27               |
| Côte d’Ivoire            | 117              |
| Congo–Brazzaville        | 59               |
| Gabon                    | 105              |
| Guinea                   | 20               |
| <b>Asia</b>              |                  |
| Viet Nam                 | 20               |
| <b>Oceanic islands</b>   |                  |
| Guadeloupe               | 43               |
| Madagascar               | 94               |
| New Caledonia            | 87               |

Table 2: **Descriptive statistics at the species level (872 species) for the wood physical and mechanical properties in the Cirad database.** See Appendix S1 for variable definitions.

| Variable                      | min   | max   | mean  | median | sd    | 95% quantiles |
|-------------------------------|-------|-------|-------|--------|-------|---------------|
| $R$ (%/%)                     | 0.190 | 0.810 | 0.461 | 0.456  | 0.098 | 0.292–0.660   |
| $S$ (%)                       | 17    | 41    | 27.93 | 28.00  | 4.06  | 20.18–36.00   |
| $D_{12}$ (g/cm <sup>3</sup> ) | 0.228 | 1.290 | 0.736 | 0.720  | 0.194 | 0.396–1.107   |
| $D_b$ (g/cm <sup>3</sup> )    | 0.191 | 1.105 | 0.608 | 0.600  | 0.157 | 0.331–0.916   |

## 572 Figure Legends

Figure 1: **Global repartition of the data available in the Cirad wood density database.** Data repartition is provided in number of species per country. Most of the species in the database (830/872) are found in the tropics (materialized by the grey band on the map).

Figure 2: **Relationship between basic wood density ( $D_b$  oven dry mass/green volume, in  $\text{g}/\text{cm}^3$ ) and wood density at 12% moisture ( $D_{12}$ ).** Grey dots represent the 3832 trees from the Cirad database for which  $D_{12}$ ,  $R$  and  $S$  have been measured and  $D_b$  computed with our new formula. The grey dashed line represents the identity line. Based on  $D_{12}$  and  $D_b$  values, we estimated the following relationship (plain large black line):  $D_b = 0.828D_{12}$  ( $n = 3832$ ,  $r^2 = 0.999$ ). Using Sallenave's data and formula, [Chave et al. \(2006\)](#) estimated a significantly different conversion factor of 0.872 (plain thin black line). We also plotted Simpson's (dashed black curve) and Reyes' relationships (dotted black line).

Figure 3: **Correlation between variables describing wood properties.** This figure shows the correlation between the volumetric shrinkage coefficient  $R$ , the fibre saturation point  $S$ , and the wood density at 12% moisture  $D_{12}$ . In the lower-left panels, numbers indicate the absolute value of the Pearson's correlation coefficient for each pair of variables. In the upper-right panels, figures show the scatter-plot for each pair of variables with a non-parametric smoother in red.

Figure 4: **Relationship between basic wood density ( $D_b$  oven dry mass/green volume, in  $\text{g}/\text{cm}^3$ ) from Cirad and GWDD databases for 411 species.** The black line represents the identity line. Grey dots represent species mean basic wood densities from Cirad and GWDD databases. These 411 species are common to the two databases but wood samples and measurement protocols differ in each database. Comparing the two databases, we obtained a Pearson correlation coefficient of 86% and a coefficient of variation of 13.69%. We also observed that, on average,  $D_b$  values in the GWDD were higher by 3.05% compared with  $D_b$  values in the Cirad database.

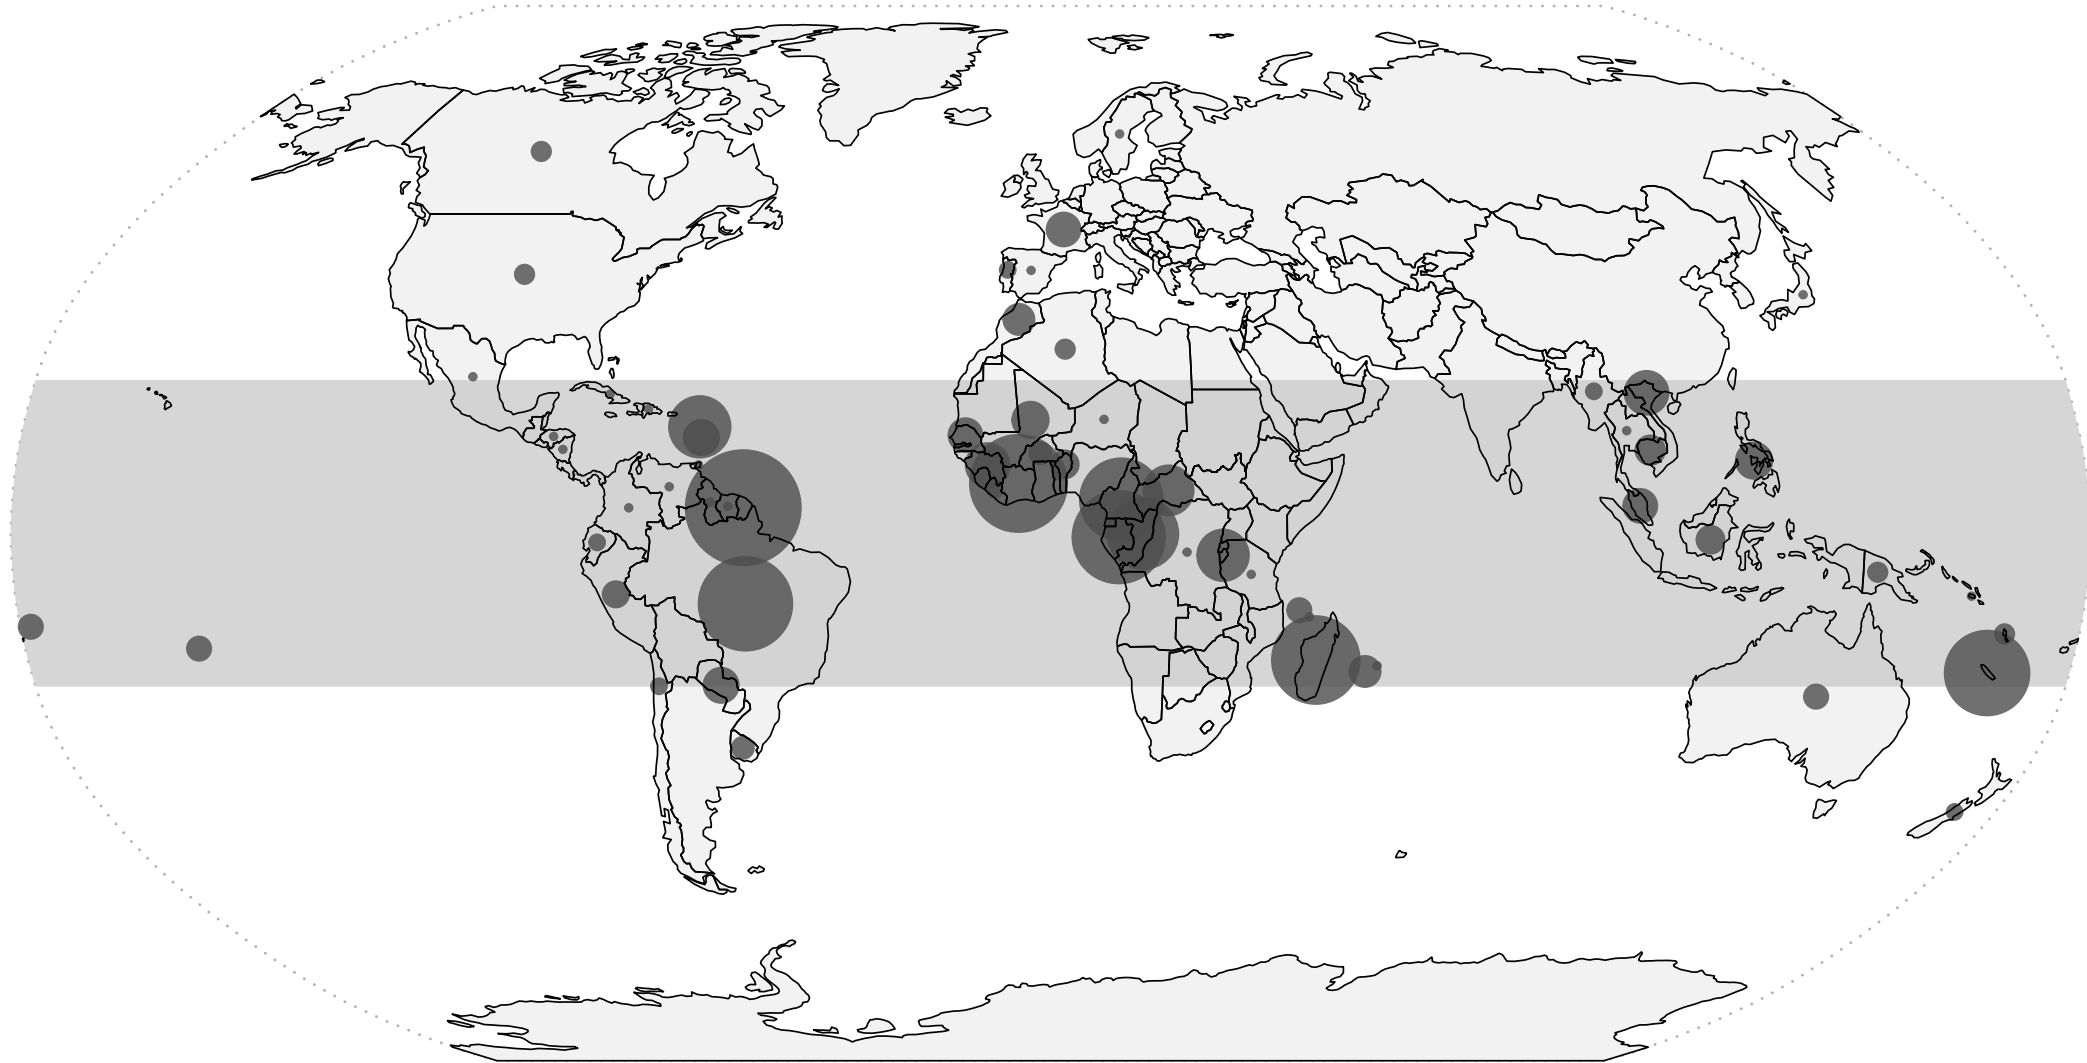

$n$  species

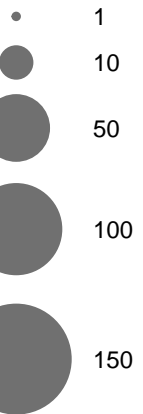

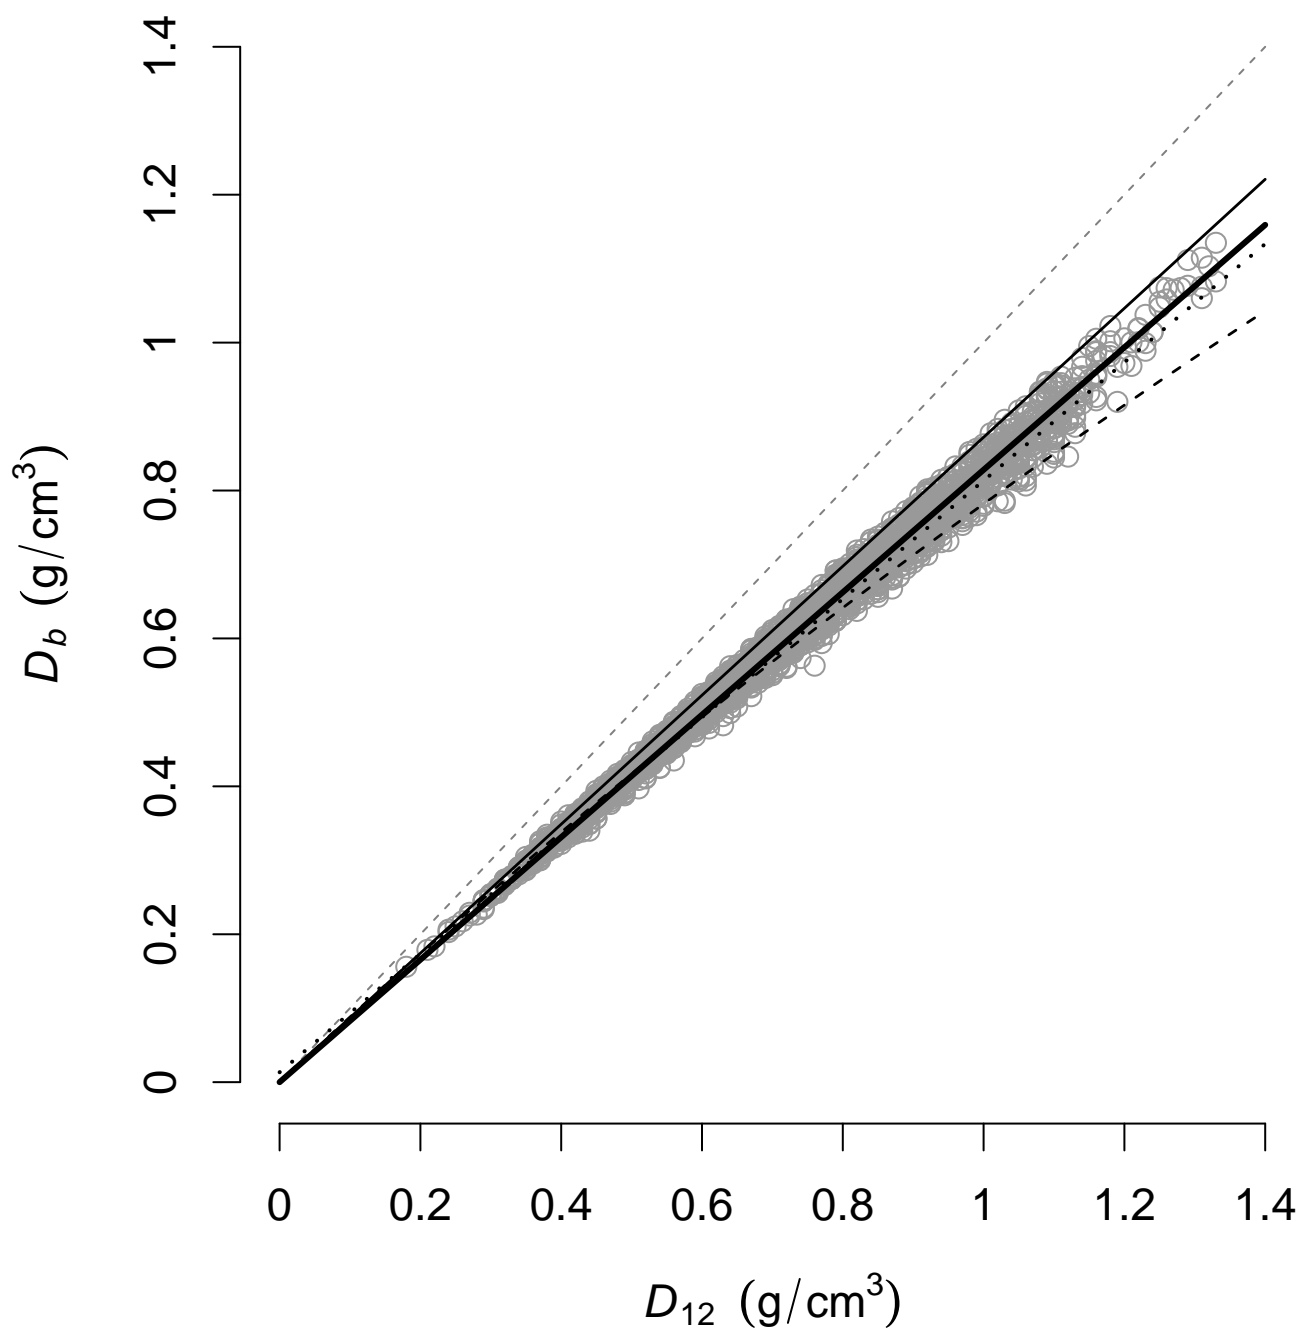



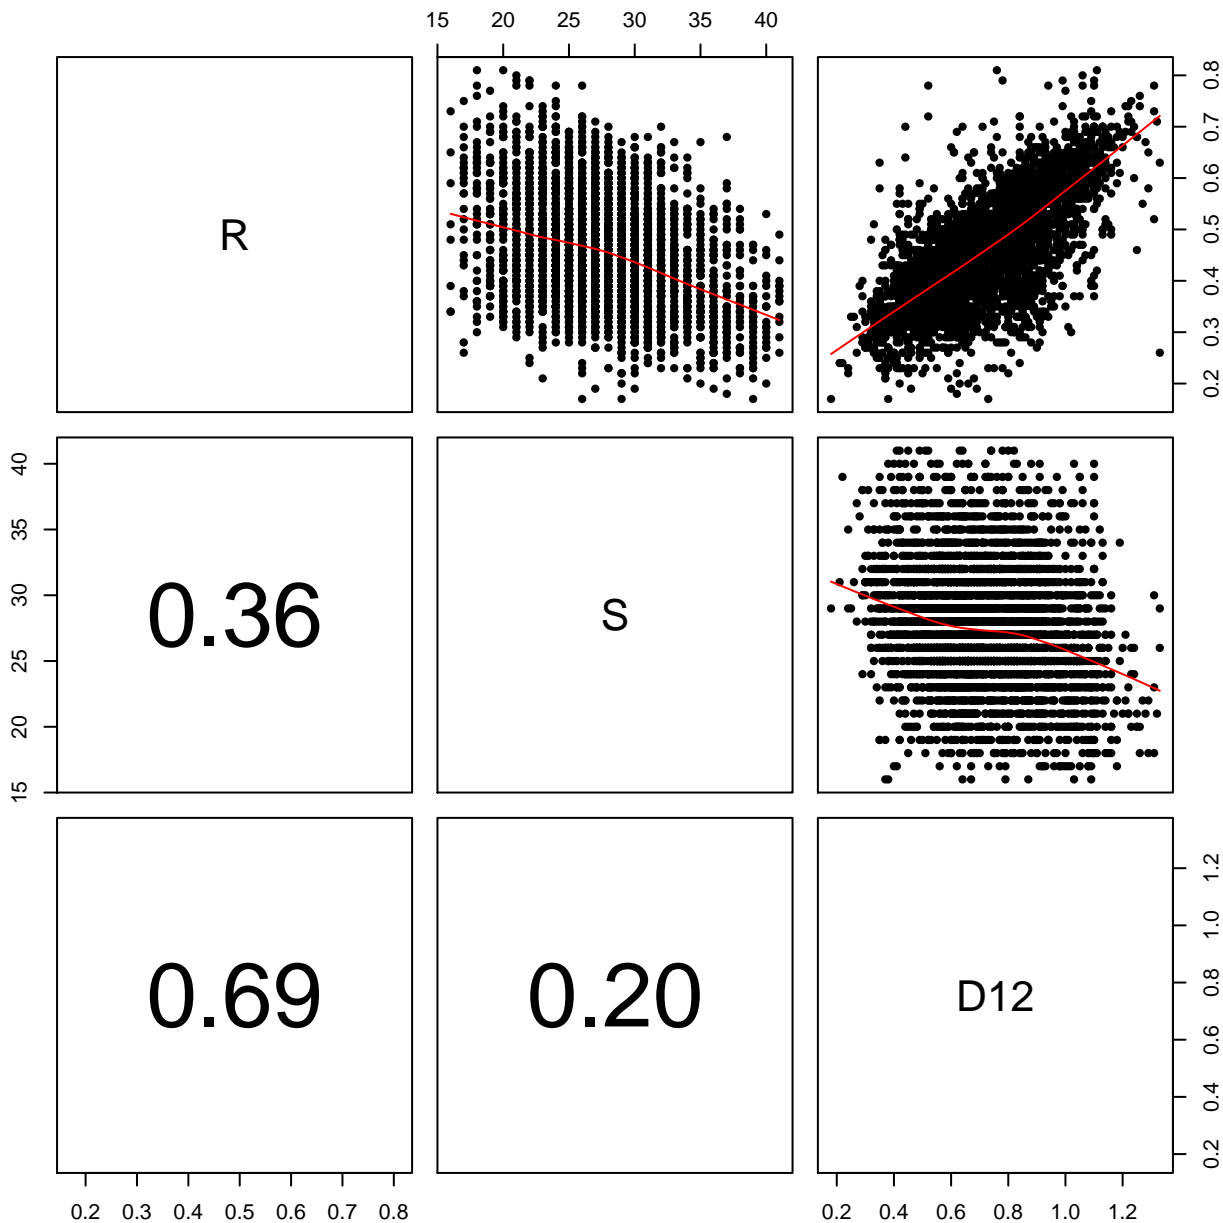

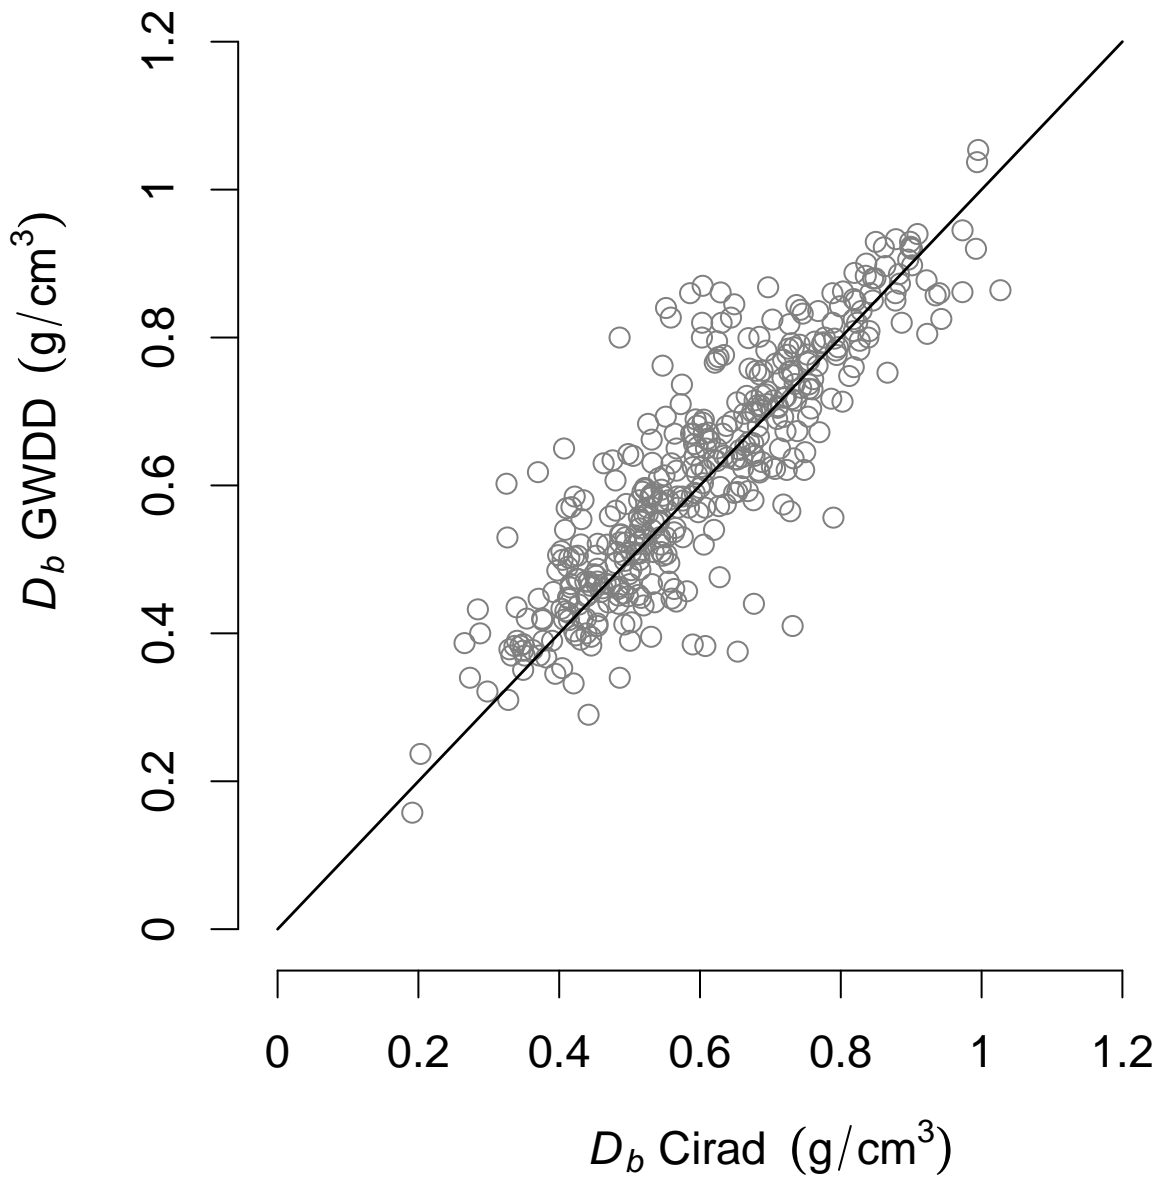

Source: https://www.biorxiv.org/content/10.1101/274068v2.full.pdf
